# Supplementary material for: Olanzapine Long-Acting Injection: A 24-Week, Randomized, Double-Blind Trial of Maintenance Treatment in Patients With Schizophrenia
Source: Atypon-hosted journal article supplement (doi:10.1176/appi.ajp.2009.07081221), 2009-12-16
Supplement: ajp_167_02_181_01.pdf [file ajp_167_02_181_01.pdf]

## List of Supplemental Tables and Figures

**Table 4a (Supplemental section).** Changes in Laboratory Measures, Weight, and Extrapramidal Symptom Scales from Randomization to 24-Week Endpoint (in Standard International Units)

**Table 4b (Supplemental section).** Changes in Laboratory Measures, Weight, and Extrapramidal Symptom Scales from Randomization to 24-Week Endpoint (in Conventional Units)

**Figure 1 (Supplemental section).** Summary of Disposition of Patients With Schizophrenia in a 24-Week, Randomized, Double-Blind Trial of Olanzapine Long-Acting Injection and Oral Olanzapine

**Figure 2 (Supplemental section).** Kaplan-Meier Estimates of Time to All Cause Discontinuation Among Patients With Schizophrenia Treated with Olanzapine Long-Acting Injection and Oral Olanzapine During a 24-Week Double-Blind Maintenance Phase

**Figure 3 (Supplemental section).** Visitwise (LOCF) Mean PANSS Total Score for Patients with Schizophrenia Treated with Olanzapine Long-Acting Injection or Oral Olanzapine for 24 Weeks

**Figure 4 (Supplemental section).** Olanzapine Plasma Concentrations Over Time for the Olanzapine Long-Acting Injection Groups Relative to the Olanzapine Concentrations at Any Time for Patients Treated with 10, 15, or 20 mg/day Oral Olanzapine

**Table 4a (Supplemental): Changes in Laboratory Measures, Weight, and Extrapyrimal Symptom Scales from Randomization to 24-Week Endpoint (in Standard International Units)**

| Measurement              | Therapy  | Dose              | Baseline at Randomization |      | Randomization-to-Endpoint Change |       | Significance Within Group | Significance Across Groups Overall | Significance vs. Olz LAI 45 mg/4wk |        |
|--------------------------|----------|-------------------|---------------------------|------|----------------------------------|-------|---------------------------|------------------------------------|------------------------------------|--------|
|                          |          |                   | N                         | Mean | SD                               | Mean  | SD                        | p                                  | p                                  | p      |
| Fasting glucose (mmol/L) | Olz LAI  | 45 mg/4wk (ref)   | 111                       | 5.42 | 1.50                             | -0.01 | 0.75                      | 0.93                               | 0.38                               | -      |
|                          |          | 150 mg/2wk (low)  | 110                       | 5.41 | 0.99                             | +0.14 | 1.36                      | 0.28                               |                                    | 0.16   |
|                          |          | 405 mg/4wk (med)  | 257                       | 5.54 | 1.68                             | +0.16 | 1.29                      | 0.05                               |                                    | 0.09   |
|                          |          | 300 mg/2wk (high) | 114                       | 5.53 | 1.84                             | +0.20 | 1.15                      | 0.07                               |                                    | 0.34   |
|                          | Oral olz | 10, 15, 20 mg/day | 285                       | 5.36 | 1.07                             | +0.07 | 0.90                      | 0.20                               | 0.53                               |        |
| Cholesterol (mmol/L)     | Olz LAI  | 45 mg/4wk         | 115                       | 5.44 | 1.24                             | -0.37 | 0.80                      | <0.001                             | <0.01                              | -      |
|                          |          | 150 mg/2wk        | 117                       | 5.35 | 1.22                             | -0.11 | 0.72                      | 0.10                               |                                    | <0.01  |
|                          |          | 405 mg/4wk        | 276                       | 5.20 | 1.18                             | -0.10 | 0.73                      | 0.02                               |                                    | <0.01  |
|                          |          | 300 mg/2wk        | 126                       | 5.30 | 1.11                             | -0.02 | 0.81                      | 0.80                               |                                    | <0.001 |
|                          | Oral olz | 10, 15, 20 mg/day | 305                       | 5.22 | 1.10                             | -0.14 | 0.80                      | <0.01                              | <0.01                              |        |
| LDL cholesterol (mmol/L) | Olz LAI  | 45 mg/4wk         | 109                       | 3.46 | 1.05                             | -0.32 | 0.68                      | <0.001                             | 0.02                               | -      |
|                          |          | 150 mg/2wk        | 114                       | 3.33 | 1.01                             | -0.08 | 0.65                      | 0.19                               |                                    | 0.01   |
|                          |          | 405 mg/4wk        | 264                       | 3.20 | 1.04                             | -0.09 | 0.63                      | 0.02                               |                                    | <0.01  |
|                          |          | 300 mg/2wk        | 123                       | 3.23 | 0.88                             | -0.01 | 0.76                      | 0.93                               |                                    | <0.01  |
|                          | Oral olz | 10, 15, 20 mg/day | 297                       | 3.23 | 0.99                             | -0.16 | 0.73                      | <0.001                             | <0.05                              |        |
| HDL cholesterol (mmol/L) | Olz LAI  | 45 mg/4wk         | 114                       | 1.14 | 0.33                             | +0.02 | 0.22                      | 0.35                               | 0.12                               | -      |
|                          |          | 150 mg/2wk        | 117                       | 1.17 | 0.35                             | +0.01 | 0.23                      | 0.72                               |                                    | 0.52   |
|                          |          | 405 mg/4wk        | 272                       | 1.12 | 0.32                             | -0.01 | 0.24                      | 0.69                               |                                    | 0.15   |
|                          |          | 300 mg/2wk        | 125                       | 1.16 | 0.32                             | -0.05 | 0.24                      | 0.01                               |                                    | 0.01   |
|                          | Oral olz | 10, 15, 20 mg/day | 305                       | 1.13 | 0.33                             | -0.01 | 0.22                      | 0.38                               | 0.11                               |        |
| Triglycerides (mmol/L)   | Olz LAI  | 45 mg/4wk         | 115                       | 1.91 | 1.37                             | -0.14 | 1.12                      | 0.17                               | 0.20                               | -      |
|                          |          | 150 mg/2wk        | 117                       | 2.05 | 2.28                             | -0.11 | 1.76                      | 0.49                               |                                    | 0.40   |
|                          |          | 405 mg/4wk        | 276                       | 2.02 | 1.42                             | -0.00 | 1.23                      | 0.99                               |                                    | 0.10   |
|                          |          | 300 mg/2wk        | 126                       | 1.99 | 1.24                             | +0.01 | 1.13                      | 0.95                               |                                    | 0.23   |
|                          | Oral olz | 10, 15, 20 mg/day | 305                       | 1.92 | 1.20                             | +0.09 | 1.20                      | 0.19                               | 0.02                               |        |

|                                                    |          |                   |     |       |       |                        |       |        |        |        |
|----------------------------------------------------|----------|-------------------|-----|-------|-------|------------------------|-------|--------|--------|--------|
| Prolactin<br>(ng/mL)                               | Olz LAI  | 45 mg/4wk         | 104 | 21.45 | 16.15 | -7.53                  | 15.24 | <0.001 | <0.01  | -      |
|                                                    |          | 150 mg/2wk        | 109 | 21.78 | 15.86 | -5.61                  | 12.49 | <0.001 |        | 0.48   |
|                                                    |          | 405 mg/4wk        | 259 | 22.59 | 23.19 | -2.76                  | 19.02 | 0.02   |        | <0.001 |
|                                                    |          | 300 mg/2wk        | 115 | 24.62 | 25.99 | +3.57 <sup>a,b,c</sup> | 33.77 | 0.26   |        | 0.04   |
|                                                    | Oral olz | 10, 15, 20 mg/day | 276 | 22.01 | 18.95 | -1.79                  | 18.59 | 0.11   |        | 0.02   |
| <b>Weight</b>                                      |          |                   |     |       |       |                        |       |        |        |        |
| Weight (kg)                                        | Olz LAI  | 45 mg/4wk         | 144 | 78.44 | 17.27 | -0.95                  | 4.09  | <0.01  | <0.001 | -      |
|                                                    |          | 150 mg/2wk        | 140 | 78.40 | 16.49 | +0.67                  | 4.38  | 0.07   |        | <0.001 |
|                                                    |          | 405 mg/4wk        | 315 | 77.80 | 15.73 | +0.89                  | 3.87  | <0.001 |        | <0.001 |
|                                                    |          | 300 mg/2wk        | 140 | 75.18 | 15.61 | +1.70 <sup>a</sup>     | 4.14  | <0.001 |        | <0.001 |
|                                                    | Oral olz | 10, 15, 20 mg/day | 322 | 76.95 | 15.91 | +1.30                  | 3.99  | <0.001 |        | <0.001 |
| <b>Extrapyramidal Symptom Scales</b>               |          |                   |     |       |       |                        |       |        |        |        |
| Simpson-<br>Angus Total                            | Olz LAI  | 45 mg/4wk         | 144 | 1.65  | 2.79  | -0.35                  | 2.20  | 0.06   | 0.64   | -      |
|                                                    |          | 150 mg/2wk        | 139 | 1.01  | 1.89  | -0.35                  | 1.53  | 0.01   |        | 0.81   |
|                                                    |          | 405 mg/4wk        | 315 | 1.31  | 2.26  | -0.28                  | 1.67  | <0.01  |        | 0.66   |
|                                                    |          | 300 mg/2wk        | 140 | 1.43  | 2.40  | -0.43                  | 1.78  | 0.01   |        | 0.81   |
|                                                    | Oral olz | 10, 15, 20 mg/day | 322 | 1.23  | 2.44  | -0.14                  | 1.90  | 0.18   |        | 0.34   |
| Barnes Global<br>Score                             | Olz LAI  | 45 mg/4wk         | 144 | 0.21  | 0.51  | -0.05                  | 0.56  | 0.30   | <0.01  | -      |
|                                                    |          | 150 mg/2wk        | 139 | 0.19  | 0.53  | 0.00                   | 0.50  | 1.00   |        | 0.45   |
|                                                    |          | 405 mg/4wk        | 315 | 0.20  | 0.48  | +0.01                  | 0.52  | 0.67   |        | 0.26   |
|                                                    |          | 300 mg/2wk        | 140 | 0.37  | 0.73  | -0.18 <sup>a,b,c</sup> | 0.73  | <0.01  |        | 0.02   |
|                                                    | Oral olz | 10, 15, 20 mg/day | 322 | 0.19  | 0.50  | -0.03                  | 0.41  | 0.17   |        | 0.74   |
| Abnormal<br>Involuntary<br>Movement<br>Scale Total | Olz LAI  | 45 mg/4wk         | 144 | 0.99  | 2.23  | -0.14                  | 1.54  | 0.28   | 0.02   | -      |
|                                                    |          | 150 mg/2wk        | 139 | 0.50  | 1.36  | -0.06                  | 0.98  | 0.44   |        | 0.52   |
|                                                    |          | 405 mg/4wk        | 316 | 0.67  | 1.75  | -0.04                  | 1.37  | 0.62   |        | 0.41   |
|                                                    |          | 300 mg/2wk        | 140 | 1.04  | 1.92  | -0.40 <sup>a,b,c</sup> | 1.55  | <0.01  |        | 0.04   |
|                                                    | Oral olz | 10, 15, 20 mg/day | 322 | 0.71  | 1.80  | -0.18                  | 1.20  | <0.01  |        | 0.68   |

Olz LAI = olanzapine long-acting injection; oral olz = oral olanzapine; ref = reference; med = medium. Within-group difference calculated by one sample t-test; pairwise treatment comparisons calculated using analysis of variance.

<sup>a</sup> p<0.05 vs. Olz LAI 150 mg/2-weeks

<sup>b</sup> p<0.05 vs. Olz LAI 405 mg/4-weeks

<sup>c</sup> p<0.05 vs. oral olanzapine

**Table 4b (Supplemental): Changes in Laboratory Measures, Weight, and Extrapyramidal Symptom Scales from Randomization to 24-Week Endpoint (in Conventional Units)**

| Measurement             | Therapy  | Dose                       | Baseline at Randomization |       | Randomization-to-Endpoint Change |       | Significance Within Group | Significance Across Groups Overall | Significance vs. Olz LAI 45 mg/4wk |        |
|-------------------------|----------|----------------------------|---------------------------|-------|----------------------------------|-------|---------------------------|------------------------------------|------------------------------------|--------|
|                         |          |                            | N                         | Mean  | SD                               | Mean  | SD                        | p                                  | p                                  | p      |
| Fasting glucose (mg/dL) | Olz LAI  | 45 mg/4wk ( <b>ref</b> )   | 111                       | 97.6  | 27.0                             | -0.2  | 13.5                      | 0.93                               | 0.38                               | -      |
|                         |          | 150 mg/2wk ( <b>low</b> )  | 110                       | 97.4  | 17.8                             | +2.5  | 24.5                      | 0.28                               |                                    | 0.16   |
|                         |          | 405 mg/4wk ( <b>med</b> )  | 257                       | 99.7  | 30.2                             | +2.9  | 23.2                      | 0.05                               |                                    | 0.09   |
|                         |          | 300 mg/2wk ( <b>high</b> ) | 114                       | 99.5  | 33.1                             | +3.6  | 20.7                      | 0.07                               |                                    | 0.34   |
|                         | Oral olz | 10, 15, 20 mg/day          | 285                       | 96.5  | 19.3                             | +1.3  | 16.2                      | 0.20                               |                                    | 0.53   |
| Cholesterol (mg/dL)     | Olz LAI  | 45 mg/4wk                  | 115                       | 210.5 | 48.0                             | -14.3 | 31.0                      | <0.001                             | <0.01                              | -      |
|                         |          | 150 mg/2wk                 | 117                       | 207.0 | 47.2                             | -4.3  | 27.9                      | 0.10                               |                                    | <0.01  |
|                         |          | 405 mg/4wk                 | 276                       | 201.2 | 45.7                             | -3.9  | 28.3                      | 0.02                               |                                    | <0.01  |
|                         |          | 300 mg/2wk                 | 126                       | 205.1 | 43.0                             | -0.8  | 31.3                      | 0.80                               |                                    | <0.001 |
|                         | Oral olz | 10, 15, 20 mg/day          | 305                       | 202.0 | 42.6                             | -5.4  | 31.0                      | <0.01                              |                                    | <0.01  |
| LDL cholesterol (mg/dL) | Olz LAI  | 45 mg/4wk                  | 109                       | 133.9 | 40.6                             | -12.4 | 26.3                      | <0.001                             | 0.02                               | -      |
|                         |          | 150 mg/2wk                 | 114                       | 128.9 | 39.1                             | -3.1  | 25.2                      | 0.19                               |                                    | 0.01   |
|                         |          | 405 mg/4wk                 | 264                       | 123.8 | 40.2                             | -3.5  | 24.4                      | 0.02                               |                                    | <0.01  |
|                         |          | 300 mg/2wk                 | 123                       | 125.0 | 34.1                             | -0.4  | 29.4                      | 0.93                               |                                    | <0.01  |
|                         | Oral olz | 10, 15, 20 mg/day          | 297                       | 125.0 | 38.3                             | -6.2  | 28.3                      | <0.001                             |                                    | <0.05  |
| HDL cholesterol (mg/dL) | Olz LAI  | 45 mg/4wk                  | 114                       | 44.1  | 12.8                             | +0.8  | 8.5                       | 0.35                               | 0.12                               | -      |
|                         |          | 150 mg/2wk                 | 117                       | 45.3  | 13.5                             | +0.4  | 8.9                       | 0.72                               |                                    | 0.52   |
|                         |          | 405 mg/4wk                 | 272                       | 43.3  | 12.4                             | -0.4  | 9.3                       | 0.69                               |                                    | 0.15   |
|                         |          | 300 mg/2wk                 | 125                       | 44.9  | 12.4                             | -1.9  | 9.3                       | 0.01                               |                                    | 0.01   |
|                         | Oral olz | 10, 15, 20 mg/day          | 305                       | 43.7  | 12.8                             | -0.4  | 8.5                       | 0.38                               |                                    | 0.11   |
| Triglycerides (mg/dL)   | Olz LAI  | 45 mg/4wk                  | 115                       | 169.2 | 121.4                            | -12.4 | 99.2                      | 0.17                               | 0.20                               | -      |
|                         |          | 150 mg/2wk                 | 117                       | 181.6 | 202.0                            | -9.7  | 155.9                     | 0.49                               |                                    | 0.40   |
|                         |          | 405 mg/4wk                 | 276                       | 179.0 | 125.8                            | -0.0  | 109.0                     | 0.99                               |                                    | 0.10   |
|                         |          | 300 mg/2wk                 | 126                       | 176.3 | 109.9                            | +0.9  | 100.1                     | 0.95                               |                                    | 0.23   |
|                         | Oral olz | 10, 15, 20 mg/day          | 305                       | 170.1 | 106.3                            | +8.0  | 106.3                     | 0.19                               |                                    | 0.02   |

|                                                    |          |                   |     |       |       |                        |       |        |        |        |
|----------------------------------------------------|----------|-------------------|-----|-------|-------|------------------------|-------|--------|--------|--------|
| Prolactin<br>(ng/mL)                               | Olz LAI  | 45 mg/4wk         | 104 | 21.45 | 16.15 | -7.53                  | 15.24 | <0.001 | <0.01  | -      |
|                                                    |          | 150 mg/2wk        | 109 | 21.78 | 15.86 | -5.61                  | 12.49 | <0.001 |        | 0.48   |
|                                                    |          | 405 mg/4wk        | 259 | 22.59 | 23.19 | -2.76                  | 19.02 | 0.02   |        | <0.001 |
|                                                    |          | 300 mg/2wk        | 115 | 24.62 | 25.99 | +3.57 <sup>a,b,c</sup> | 33.77 | 0.26   |        | 0.04   |
|                                                    | Oral olz | 10, 15, 20 mg/day | 276 | 22.01 | 18.95 | -1.79                  | 18.59 | 0.11   |        | 0.02   |
| <b>Weight</b>                                      |          |                   |     |       |       |                        |       |        |        |        |
| Weight (kg)                                        | Olz LAI  | 45 mg/4wk         | 144 | 78.44 | 17.27 | -0.95                  | 4.09  | <0.01  | <0.001 | -      |
|                                                    |          | 150 mg/2wk        | 140 | 78.40 | 16.49 | +0.67                  | 4.38  | 0.07   |        | <0.001 |
|                                                    |          | 405 mg/4wk        | 315 | 77.80 | 15.73 | +0.89                  | 3.87  | <0.001 |        | <0.001 |
|                                                    |          | 300 mg/2wk        | 140 | 75.18 | 15.61 | +1.70 <sup>a</sup>     | 4.14  | <0.001 |        | <0.001 |
|                                                    | Oral olz | 10, 15, 20 mg/day | 322 | 76.95 | 15.91 | +1.30                  | 3.99  | <0.001 |        | <0.001 |
| <b>Extrapyramidal Symptom Scales</b>               |          |                   |     |       |       |                        |       |        |        |        |
| Simpson-<br>Angus Total                            | Olz LAI  | 45 mg/4wk         | 144 | 1.65  | 2.79  | -0.35                  | 2.20  | 0.06   | 0.64   | -      |
|                                                    |          | 150 mg/2wk        | 139 | 1.01  | 1.89  | -0.35                  | 1.53  | 0.01   |        | 0.81   |
|                                                    |          | 405 mg/4wk        | 315 | 1.31  | 2.26  | -0.28                  | 1.67  | <0.01  |        | 0.66   |
|                                                    |          | 300 mg/2wk        | 140 | 1.43  | 2.40  | -0.43                  | 1.78  | 0.01   |        | 0.81   |
|                                                    | Oral olz | 10, 15, 20 mg/day | 322 | 1.23  | 2.44  | -0.14                  | 1.90  | 0.18   |        | 0.34   |
| Barnes Global<br>Score                             | Olz LAI  | 45 mg/4wk         | 144 | 0.21  | 0.51  | -0.05                  | 0.56  | 0.30   | <0.01  | -      |
|                                                    |          | 150 mg/2wk        | 139 | 0.19  | 0.53  | 0.00                   | 0.50  | 1.00   |        | 0.45   |
|                                                    |          | 405 mg/4wk        | 315 | 0.20  | 0.48  | +0.01                  | 0.52  | 0.67   |        | 0.26   |
|                                                    |          | 300 mg/2wk        | 140 | 0.37  | 0.73  | -0.18 <sup>a,b,c</sup> | 0.73  | <0.01  |        | 0.02   |
|                                                    | Oral olz | 10, 15, 20 mg/day | 322 | 0.19  | 0.50  | -0.03                  | 0.41  | 0.17   |        | 0.74   |
| Abnormal<br>Involuntary<br>Movement<br>Scale Total | Olz LAI  | 45 mg/4wk         | 144 | 0.99  | 2.23  | -0.14                  | 1.54  | 0.28   | 0.02   | -      |
|                                                    |          | 150 mg/2wk        | 139 | 0.50  | 1.36  | -0.06                  | 0.98  | 0.44   |        | 0.52   |
|                                                    |          | 405 mg/4wk        | 316 | 0.67  | 1.75  | -0.04                  | 1.37  | 0.62   |        | 0.41   |
|                                                    |          | 300 mg/2wk        | 140 | 1.04  | 1.92  | -0.40 <sup>a,b,c</sup> | 1.55  | <0.01  |        | 0.04   |
|                                                    | Oral olz | 10, 15, 20 mg/day | 322 | 0.71  | 1.80  | -0.18                  | 1.20  | <0.01  |        | 0.68   |

Olz LAI = olanzapine long-acting injection; oral olz = oral olanzapine; ref = reference; med = medium. Within-group difference calculated by one sample t-test; pairwise treatment comparisons calculated using analysis of variance.

<sup>a</sup> p<0.05 vs. Olz LAI 150 mg/2-weeks

<sup>b</sup> p<0.05 vs. Olz LAI 405 mg/4-weeks

<sup>c</sup> p<0.05 vs. oral olanzapine

**Figure 1 (Supplemental section). Summary of Disposition of Patients With Schizophrenia in a 24-Week, Randomized, Double-Blind Trial of Olanzapine Long-Acting Injection and Oral Olanzapine**

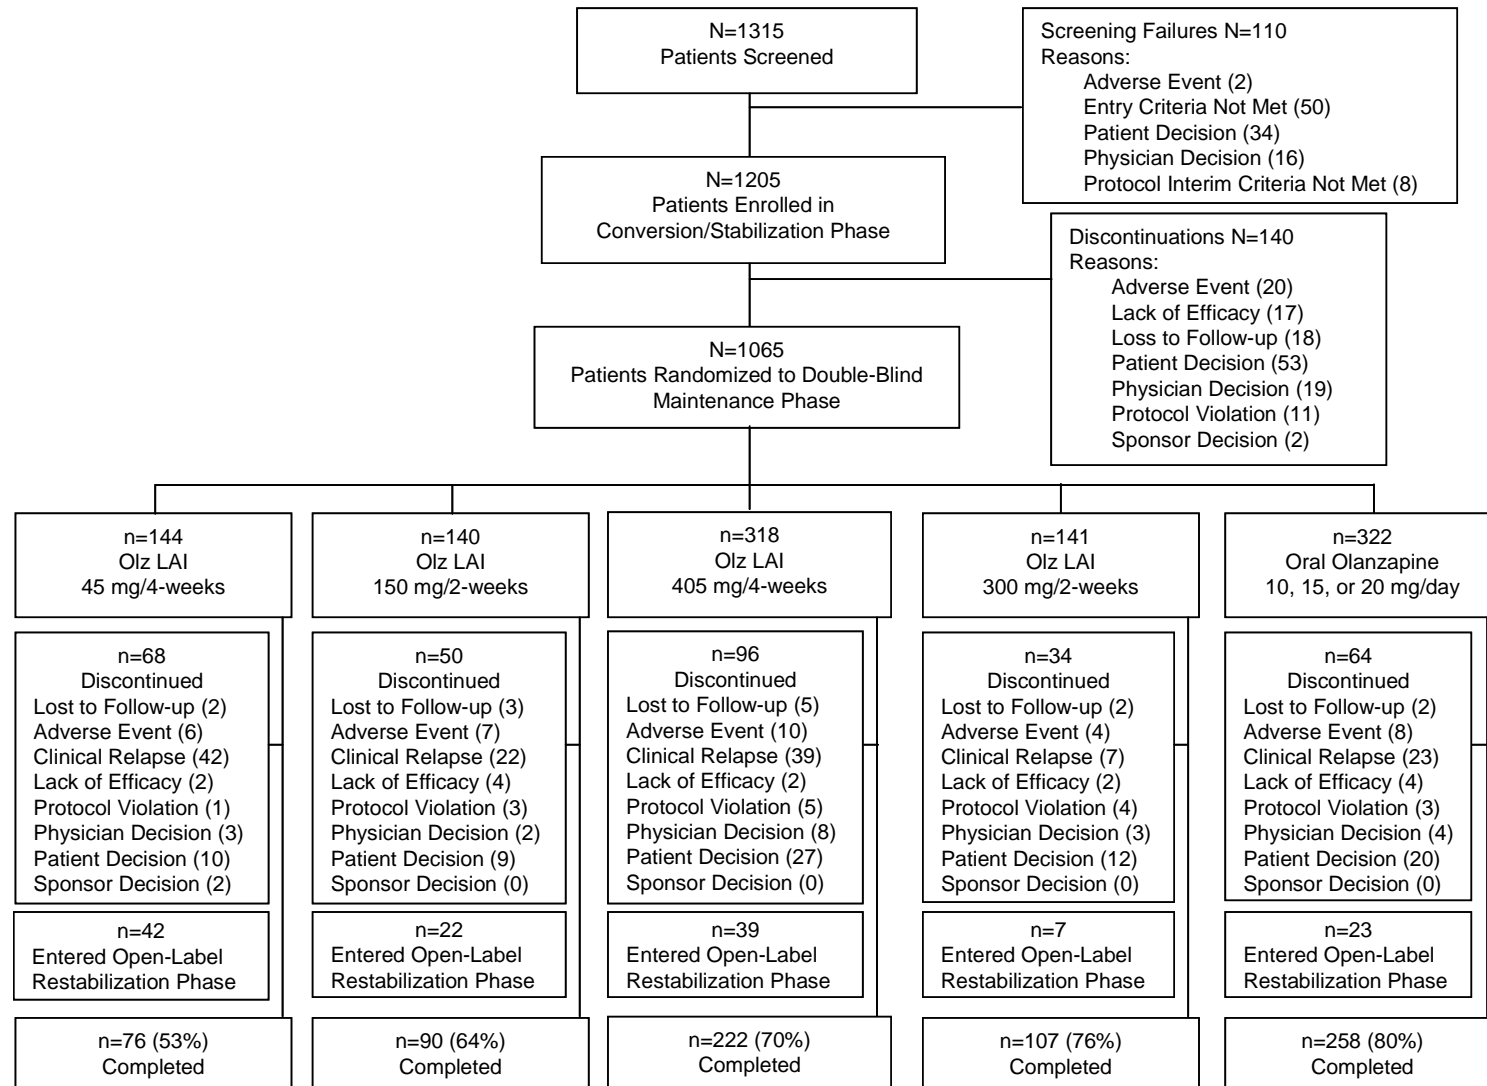

Olz LAI = olanzapine long-acting injection.

**Figure 2 (Supplemental section). Kaplan-Meier Estimates of Time to All Cause Discontinuation Among Patients With Schizophrenia Treated with Olanzapine Long-Acting Injection and Oral Olanzapine During a 24-Week Double-Blind Maintenance Phase**

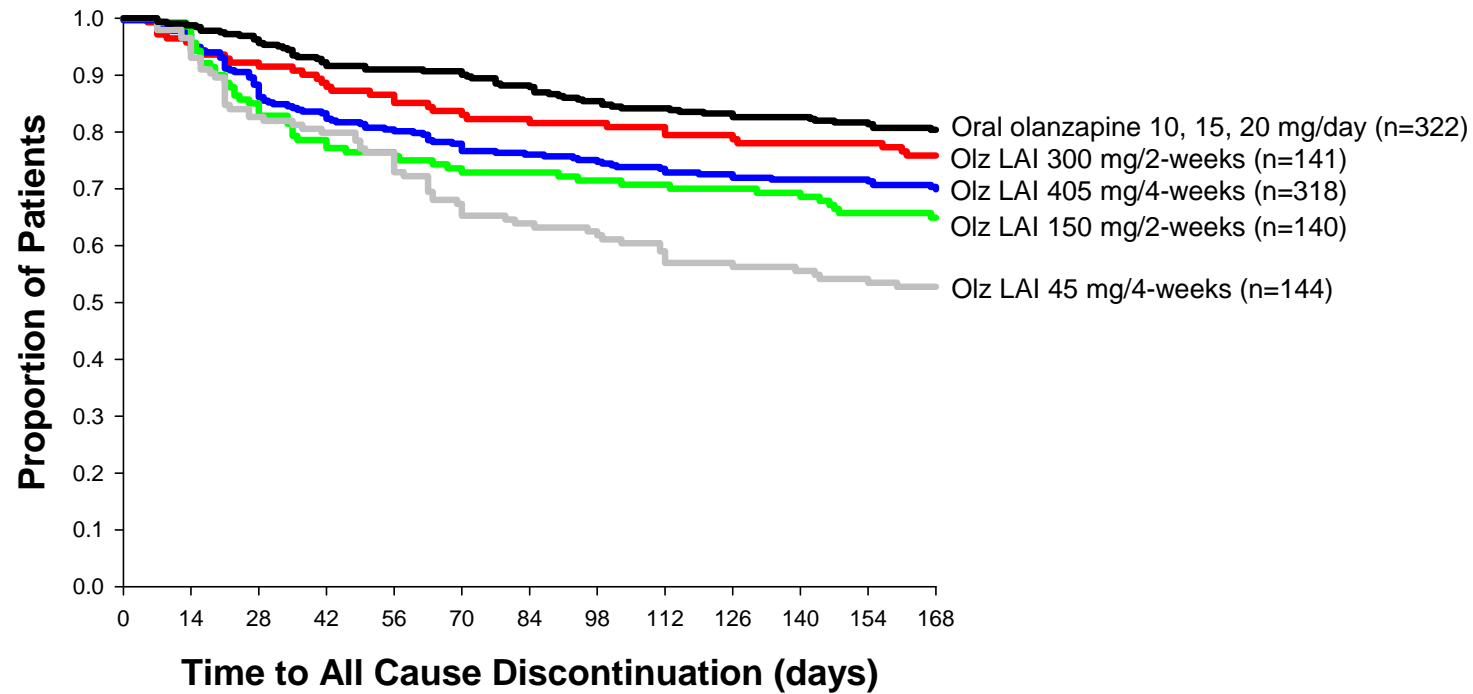

Olz LAI = olanzapine long-acting injection.

Log-rank test for Olz LAI 300 mg/2-weeks, 405 mg/4-weeks, and oral olanzapine vs. Olz LAI 45 mg/4-weeks and for oral olanzapine vs. Olz LAI 150 mg/2-weeks, all  $p < 0.001$ . Oral olanzapine vs. Olz LAI 405 mg/4-weeks,  $p = 0.001$ . Olz LAI 150 mg/2 weeks vs. 45 mg/4-weeks,  $p = 0.065$ .

**Figure 3 (Supplemental section). Visitwise (LOCF) Mean PANSS Total Score for Patients with Schizophrenia Treated with Olanzapine Long-Acting Injection or Oral Olanzapine for 24 Weeks**

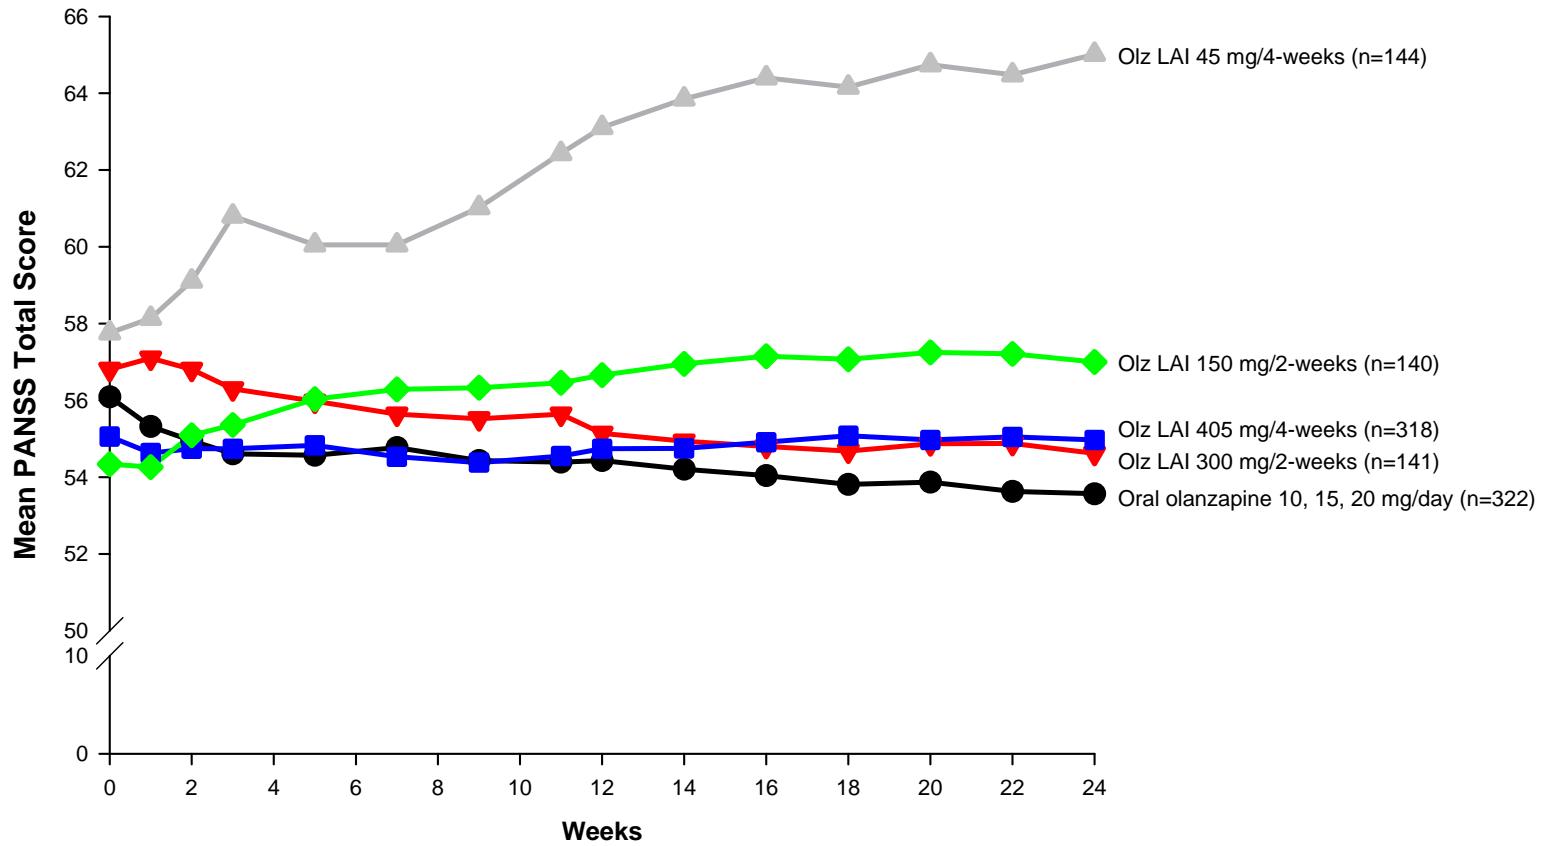

Olz LAI = olanzapine long-acting injection.



**Figure 4 (Supplemental section). Olanzapine Plasma Concentrations Over Time for the Olanzapine Long-Acting Injection Groups Relative to the Olanzapine Concentrations at Any Time for Patients Treated with 10, 15, or 20 mg/day Oral Olanzapine**

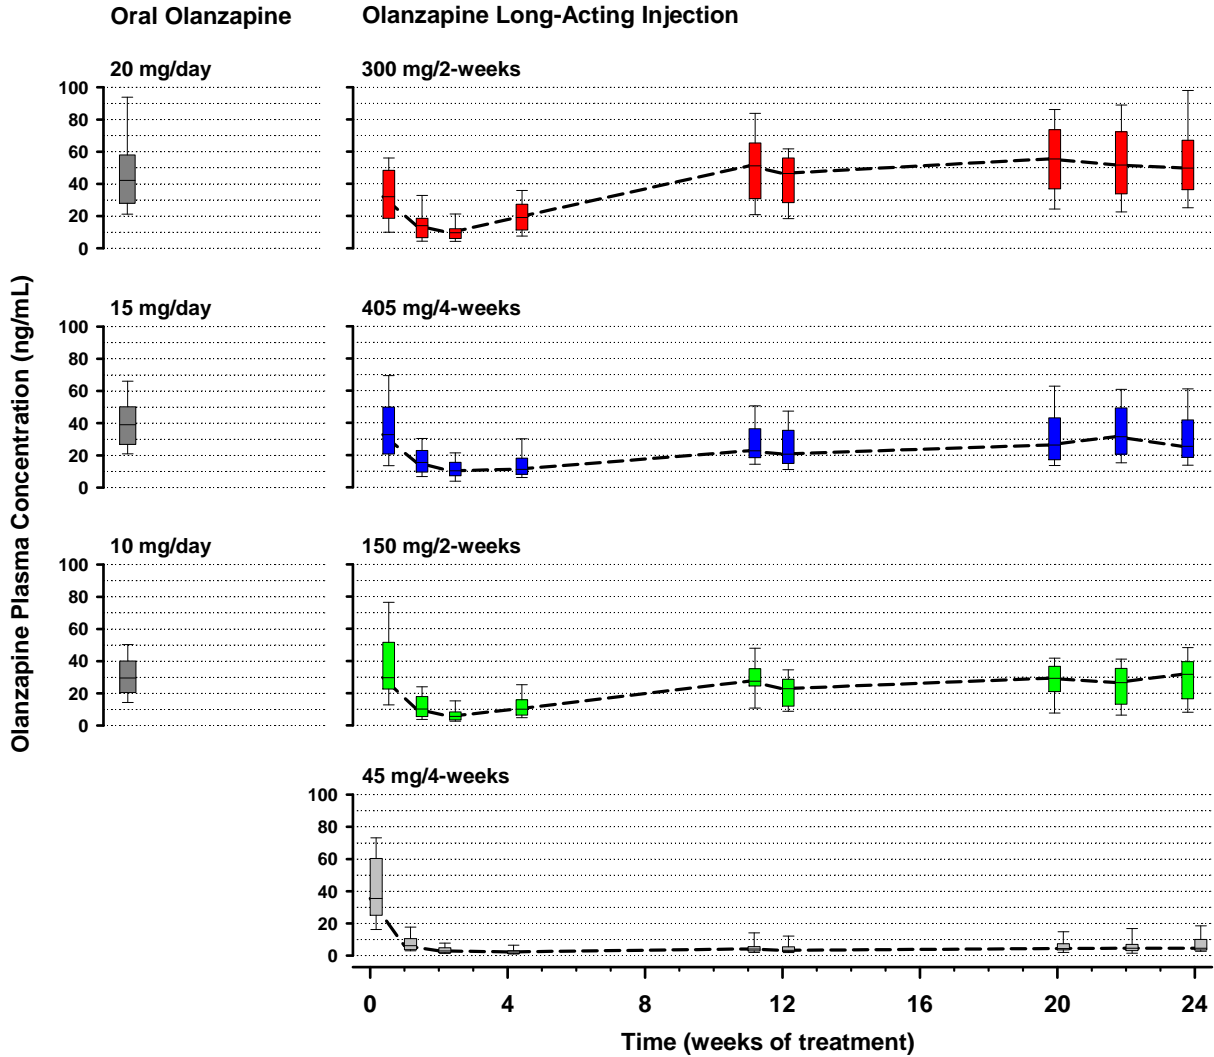

For box-and-whiskers plots, bottom and top borders of box are the 25th and 75th percentiles, respectively; bottom and top whiskers are the 10th and 90th percentiles, respectively. Dashed lines connect median (50th percentile) concentrations. These graphs illustrate summary detail of analyzable olanzapine concentration measurements (2419 blood samples collected from 341 patients) taken at infrequent intervals over a period of 24 weeks. Olz LAI = olanzapine long-acting injection.
